# Supplementary material
Source: publisher figshare collection journal article supplement (https://sage.figshare.com/ndownloader/files/21922599)
Supplement: Supplementary file 1 [file 21922599]

Supplemental Material for *Making Visible the Invisible: Multi-Study Investigation of Disproportionate Special Education Identification of U.S. Asian American and Pacific Islander Students*

Supplemental Table A. Child counts for Autism, Deaf Blind, Developmental Delay and Emotional Disturbance

| State | Autism | | | DeafBlind | | | Developmental Delay | | | Emotional Disturbance | | |
| --- | --- | --- | --- | --- | --- | --- | --- | --- | --- | --- | --- | --- |
| Aut_W | Aut_AA | DB_W | DB_W | DB_PI | DB_PI | DD_W | DD_AA | DD_PI | ED_W | ED_AA | ED_PI |
| **U.S.** | **303075** | **29533** | **74509** | **696** | **51** | **4** | **74509** | **3103** | **623** | **179509** | **3285** | **870** |
| Alabama | 3903 | 70 | 1573 | 11 | 0 | 0 | 1573 | 27 | 3 | 748 | 0 | 0 |
| Alaska | 730 | 72 | 398 | 0 | 1 | 0 | 398 | 37 | 24 | 321 | 7 | 14 |
| Arizona | 5518 | 315 | 1709 | 41 | 1 | 0 | 1709 | 80 | 15 | 3733 | 27 | 8 |
| Arkansas | 2911 | 74 | 0 | 1 | 0 | 0 | 0 | 0 | - | 581 | 4 | 2 |
| California | 24944 | 10823 | 0 | 29 | 10 | 0 | 0 | 0 | - | 9371 | 739 | 102 |
| Colorado | 3798 | 143 | 1148 | 13 | 1 | 0 | 1148 | 59 | 4 | 3352 | 53 | 14 |
| Connecticut | 4780 | 358 | 0 | 8 | 0 | 0 | 0 | 0 | - | 2590 | 57 | 2 |
| Delaware | 813 | 60 | 373 | 20 | 1 | 0 | 373 | 16 | 1 | 356 | 1 | 1 |
| District of Columbia | 99 | 11 | 31 | 0 | 0 | 0 | 31 | 3 | 0 | 16 | 2 | 0 |
| Florida | 13628 | 830 | 0 | 32 | 2 | 0 | 0 | 0 | - | 5991 | 35 | 14 |
| Georgia | 7600 | 648 | 5289 | 16 | 1 | 0 | 5289 | 277 | 15 | 4809 | 48 | 11 |
| Hawaii | 338 | 411 | 95 | 0 | 2 | 4 | 95 | 190 | 332 | 151 | 124 | 432 |
| Idaho | 2073 | 39 | 1242 | 31 | 4 | 0 | 1242 | 24 | 0 | 1122 | 11 | 0 |
| Illinois | 11988 | 1132 | 8965 | 15 | 0 | 0 | 8965 | 504 | 30 | 9640 | 217 | 15 |
| Indiana | 10781 | 219 | 0 | 18 | 0 | 0 | 0 | 0 | - | 8740 | 20 | 8 |
| Iowa | 470 | 7 | 0 | 0 | 0 | 0 | 0 | 0 | - | 4102 | 64 | 11 |
| Kansas | 2505 | 100 | 3997 | 9 | 2 | 0 | 3997 | 78 | 5 | 1505 | 12 | 2 |
| Kentucky | 4546 | 65 | 5212 | 8 | 0 | 0 | 5212 | 44 | 3 | 3125 | 6 | 1 |
| Louisiana | 2397 | 97 | 2977 | 2 | - | - | 2977 | 41 | 2 | 662 | 2 | 1 |
| Maine | 2490 | 24 | 28 | 0 | 0 | 0 | 28 | 1 | 0 | 1983 | 15 | 1 |
| Maryland | 4148 | 615 | 750 | 7 | 0 | 0 | 750 | 156 | 3 | 2119 | 49 | 8 |
| Massachusetts | 10825 | 826 | 6546 | 95 | 7 | 0 | 6546 | 332 | 11 | 8733 | 216 | 9 |
| Michigan | 11916 | 453 | 1248 | 5 | 1 | 0 | 1248 | 37 | 1 | 7954 | 52 | 4 |
| Minnesota | 11920 | 770 | 1634 | 44 | 6 | 0 | 1634 | 122 | 4 | 8839 | 167 | 6 |
| Mississippi | 2298 | 40 | 1882 | 5 | 0 | 0 | 1882 | 24 | 3 | 1477 | 8 | 0 |
| Missouri | 7478 | 218 | 560 | 18 | 0 | 0 | 560 | 16 | 0 | 4256 | 21 | 4 |
| Montana | 561 | 4 | 0 | 4 | 0 | 0 | 0 | - | - | 575 | 3 | 3 |
| Nebraska | 2256 | 61 | 1030 | 8 | 0 | 0 | 1030 | 22 | 4 | 1353 | 9 | 3 |
| Nevada | 2306 | 354 | 0 | 2 | 1 | 0 | 0 | - | - | 808 | 15 | 14 |
| New Hampshire | 2178 | 51 | 1668 | 7 | 0 | 0 | 1668 | 24 | 4 | 1918 | 5 | 2 |
| New Jersey | 9369 | 1640 | 0 | 13 | 2 | 0 | 0 | - | - | 3542 | 162 | 11 |
| New Mexico | 997 | 45 | 577 | 4 | 0 | 0 | 577 | 9 | 4 | 587 | 6 | 1 |
| New York | 15623 | 1733 | 0 | 5 | 0 | 0 | 0 | - | - | 8050 | 330 | 31 |
| North Carolina | 8892 | 456 | 2777 | 12 | 0 | 0 | 2777 | 128 | 7 | 2322 | 19 | 5 |
| North Dakota | 768 | 10 | 728 | 3 | 0 | 0 | 728 | 8 | 1 | 654 | 0 | 4 |
| Ohio | 15219 | 369 | 0 | 25 | 0 | 0 | 0 | - | - | 8438 | 55 | 4 |
| Oklahoma | 3035 | 99 | 8337 | 9 | 1 | 0 | 8337 | 159 | 29 | 2195 | 10 | 4 |
| Oregon | 6158 | 333 | 0 | 4 | 1 | 0 | 0 | - | - | 3342 | 38 | 18 |
| Pennsylvania | 19354 | 796 | 86 | 38 | 0 | 0 | 86 | 6 | 0 | 14058 | 124 | 11 |
| Rhode Island | 1587 | 33 | 706 | 1 | 0 | 0 | 706 | 34 | 3 | 960 | 15 | 1 |
| South Carolina | 3499 | 107 | 1678 | 8 | 0 | 0 | 1678 | 34 | 3 | 1060 | 7 | 4 |
| South Dakota | 799 | 10 | 0 | 3 | 0 | 0 | 0 | - | - | 802 | 0 | 1 |
| Tennessee | 5986 | 130 | 3337 | 9 | 2 | 0 | 3337 | 94 | 5 | 1902 | 12 | 2 |
| Texas | 17488 | 2437 | 0 | 54 | 1 | 0 | 0 | - | - | 10473 | 175 | 14 |
| Utah | 4370 | 61 | 1460 | 16 | 3 | 0 | 1460 | 22 | 38 | 1436 | 9 | 16 |
| Vermont | 909 | 17 | 897 | 3 | 0 | 0 | 897 | 6 | 1 | 1826 | 6 | 6 |
| Virginia | 8999 | 1102 | 976 | 16 | 0 | 0 | 976 | 151 | 3 | 4619 | 148 | 13 |
| Washington | 7368 | 918 | 4169 | 8 | 1 | - | 4169 | 328 | 65 | 2817 | 88 | 24 |
| West Virginia | 1783 | 15 | 0 | 14 | 0 | 0 | 0 | - | - | 1095 | 2 | 0 |
| Wisconsin | 7967 | 322 | 247 | 2 | 0 | 0 | 247 | 9 | 0 | 7871 | 86 | 7 |
| Wyoming | 707 | 7 | 179 | 0 | 0 | 0 | 179 | 1 | 0 | 452 | 4 | 1 |

Supplemental Table B. *Child Counts for Hearing Impairment, Intellectual Disability, Multiple Disabilities and Orthopedic Impairment*

| State | Hearing Impairment | | | | Intellectual Disability | | | | | | Multiple Disabilities | | | | | | Orthopedic Impairment | | | | | |
| --- | --- | --- | --- | --- | --- | --- | --- | --- | --- | --- | --- | --- | --- | --- | --- | --- | --- | --- | --- | --- | --- | --- |
| HI_W | HI_AA | HI_W | | ID_W | | ID_PI | | ID_PI | | MD_W | | MD_AA | | MD_PI | | OI_W | | OI_AA | | OI_PI | |
| **U.S.** | **30697** | **3742** | | **363** | | **180398** | | **10259** | | **1369** | | **68987** | | **4006** | | **485** | | **20983** | | **1838** | | **124** | |
| Alabama | 493 | 19 | | 1 | | 2777 | | 32 | | 4 | | 670 | | 16 | | 0 | | 320 | | 13 | | 0 | |
| Alaska | 57 | 19 | | 13 | | 215 | | 29 | | 23 | | 189 | | 20 | | 10 | | 35 | | 6 | | 3 | |
| Arizona | 425 | 38 | | 5 | | 2189 | | 141 | | 28 | | 842 | | 51 | | 6 | | 288 | | 16 | | 0 | |
| Arkansas | 239 | 9 | | 19 | | 3064 | | 30 | | 42 | | 898 | | 21 | | 2 | | 132 | | 2 | | 1 | |
| California | 2293 | 991 | | 67 | | 7707 | | 3148 | | 215 | | 1496 | | 542 | | 37 | | 2862 | | 766 | | 56 | |
| Colorado | 581 | 71 | | 1 | | 1063 | | 48 | | 12 | | 1930 | | 99 | | 5 | | 1958 | | 45 | | 5 | |
| Connecticut | 243 | 31 | | 0 | | 1058 | | 66 | | 2 | | 1450 | | 109 | | 4 | | 28 | | 2 | | 0 | |
| Delaware | 81 | 4 | | 0 | | 520 | | 25 | | 1 | | 0 | | 0 | | - | | 100 | | 10 | | 0 | |
| District Of Columbia | 2 | 1 | | 0 | | 9 | | 1 | | 0 | | 78 | | 5 | | 1 | | 0 | | 1 | | 0 | |
| Florida | 1530 | 109 | | 6 | | 8275 | | 399 | | 24 | | 0 | | 0 | | - | | 1168 | | 61 | | 3 | |
| Georgia | 627 | 65 | | 2 | | 5185 | | 266 | | 12 | | 0 | | 0 | | - | | 374 | | 34 | | 0 | |
| Hawaii | 14 | 71 | | 127 | | 96 | | 325 | | 547 | | 58 | | 201 | | 221 | | 12 | | 15 | | 24 | |
| Idaho | 167 | 10 | | 0 | | 1366 | | 26 | | 0 | | 452 | | 10 | | 0 | | 62 | | 3 | | 0 | |
| Illinois | 1593 | 143 | | 8 | | 6606 | | 417 | | 20 | | 1459 | | 98 | | 7 | | 637 | | 54 | | 2 | |
| Indiana | 1548 | 75 | | 4 | | 8732 | | 136 | | 10 | | 1469 | | 31 | | 3 | | 1042 | | 46 | | 0 | |
| Iowa | 289 | 5 | | 1 | | 7257 | | 113 | | 19 | | 228 | | 4 | | 1 | | 470 | | 7 | | 1 | |
| Kansas | 342 | 24 | | 0 | | 1909 | | 55 | | 4 | | 1963 | | 40 | | 5 | | 153 | | 9 | | 1 | |
| Kentucky | 481 | 19 | | 0 | | 10864 | | 75 | | 5 | | 1590 | | 20 | | 3 | | 309 | | 6 | | 0 | |
| Louisiana | 529 | 19 | | 3 | | 2299 | | 44 | | 3 | | 509 | | 10 | | 2 | | 532 | | 13 | | 1 | |
| Maine | 112 | 2 | | 0 | | 689 | | 3 | | 0 | | 2700 | | 32 | | 3 | | 35 | | 0 | | 0 | |
| Maryland | 376 | 64 | | 1 | | 1448 | | 157 | | 7 | | 2509 | | 158 | | 5 | | 81 | | 9 | | 0 | |
| Massachusetts | 622 | 69 | | 1 | | 3837 | | 248 | | 7 | | 2408 | | 108 | | 3 | | 661 | | 46 | | 0 | |
| Michigan | 1555 | 83 | | 3 | | 9917 | | 214 | | 14 | | 1736 | | 57 | | 2 | | 1052 | | 37 | | 1 | |
| Minnesota | 1297 | 255 | | 1 | | 4751 | | 336 | | 4 | | 914 | | 74 | | 3 | | 1020 | | 99 | | 2 | |
| Mississippi | 323 | 12 | | 0 | | 977 | | 12 | | 0 | | 570 | | 8 | | 0 | | 217 | | 6 | | 0 | |
| Missouri | 756 | 25 | | 2 | | 5865 | | 105 | | 9 | | 913 | | 33 | | 2 | | 343 | | 12 | | 0 | |
| Montana | 54 | 2 | | 0 | | 409 | | 5 | | 4 | | 2599 | | 23 | | 8 | | 37 | | 0 | | 0 | |
| Nebraska | 429 | 24 | | 2 | | 1841 | | 44 | | 1 | | 286 | | 3 | | 0 | | 171 | | 11 | | 0 | |
| Nevada | 123 | 21 | | 8 | | 530 | | 75 | | 21 | | 445 | | 67 | | 17 | | 110 | | 12 | | 2 | |
| New Hampshire | 150 | 9 | | 0 | | 674 | | 13 | | 0 | | 323 | | 9 | | 1 | | 46 | | 2 | | 0 | |
| New Jersey | 727 | 137 | | 2 | | 1367 | | 226 | | 5 | | 7284 | | 602 | | 22 | | 222 | | 30 | | 1 | |
| New Mexico | 115 | 11 | | 0 | | 382 | | 20 | | 1 | | 191 | | 6 | | 1 | | 64 | | 3 | | 0 | |
| New York | 1717 | 377 | | 7 | | 4150 | | 651 | | 41 | | 8123 | | 687 | | 35 | | 729 | | 103 | | 5 | |
| North Carolina | 717 | 52 | | 6 | | 5797 | | 175 | | 8 | | 1323 | | 58 | | 5 | | 426 | | 29 | | 1 | |
| North Dakota | 82 | 1 | | 1 | | 554 | | 6 | | 1 | | 0 | | 0 | | - | | 59 | | 2 | | 0 | |
| Ohio | 1311 | 45 | | 2 | | 12481 | | 109 | | 10 | | 8912 | | 160 | | 9 | | 1004 | | 38 | | 0 | |
| Oklahoma | 644 | 24 | | 3 | | 2712 | | 50 | | 27 | | 873 | | 15 | | 3 | | 197 | | 3 | | 0 | |
| Oregon | 431 | 52 | | 15 | | 2427 | | 87 | | 24 | | 0 | | 0 | | - | | 436 | | 20 | | 3 | |
| Pennsylvania | 1737 | 116 | | 2 | | 10594 | | 349 | | 7 | | 2016 | | 71 | | 2 | | 477 | | 18 | | 0 | |
| Rhode Island | 74 | 0 | | 0 | | 424 | | 13 | | 1 | | 236 | | 13 | | 0 | | 36 | | 2 | | 0 | |
| South Carolina | 447 | 25 | | 1 | | 2079 | | 44 | | 6 | | 710 | | 12 | | 2 | | 274 | | 8 | | 0 | |
| South Dakota | 78 | 5 | | 1 | | 1084 | | 30 | | 0 | | 338 | | 9 | | 1 | | 46 | | 0 | | 0 | |
| Tennessee | 712 | 31 | | 1 | | 4582 | | 84 | | 7 | | 1340 | | 23 | | 3 | | 414 | | 17 | | 0 | |
| Texas | 1654 | 244 | | 13 | | 9202 | | 860 | | 70 | | 2196 | | 205 | | 9 | | 916 | | 100 | | 5 | |
| Utah | 281 | 15 | | 8 | | 2292 | | 59 | | 60 | | 1092 | | 21 | | 15 | | 108 | | 5 | | 2 | |
| Vermont | 61 | 3 | | 0 | | 623 | | 9 | | 1 | | 197 | | 3 | | 0 | | 33 | | 0 | | 0 | |
| Virginia | 584 | 138 | | 2 | | 3739 | | 368 | | 8 | | 1586 | | 150 | | 3 | | 354 | | 64 | | 2 | |
| Washington | 472 | 71 | | 21 | | 2482 | | 250 | | 48 | | 1680 | | 121 | | 24 | | 245 | | 19 | | 3 | |
| West Virginia | 383 | 1 | | 0 | | 6233 | | 15 | | 1 | | 0 | | 0 | | - | | 94 | | 1 | | 0 | |
| Wisconsin | 1042 | 105 | | 3 | | 4705 | | 262 | | 4 | | 0 | | 0 | | - | | 550 | | 32 | | 0 | |
| Wyoming | 97 | 0 | | 0 | | 360 | | 4 | | 1 | | 206 | | 1 | | 0 | | 44 | | 1 | | 0 | |

Supplemental Table C. *Child Counts for Other Health Impairment, Specific Learning Disability, Speech Language Disability, Traumatic Brain Injury*

| State | Other Health Impairment | | | Specific Learning Disability | | | Speech Language Disability | | | Traumatic Brain Injury | | |
| --- | --- | --- | --- | --- | --- | --- | --- | --- | --- | --- | --- | --- |
| HI_W | HI_AA | HI_W | ID_W | ID_PI | ID_PI | MD_W | MD_AA | MD_PI | OI_W | OI_AA | OI_PI |
| **U.S.** | **516493** | **12468** | **2220** | **1028756** | **34906** | **8230** | **534727** | **35052** | **2163** | **14904** | **639** | **76** |
| Alabama | 6255 | 40 | 3 | 16310 | 95 | 25 | 8301 | 106 | 7 | 142 | 0 | 1 |
| Alaska | 1229 | 40 | 14 | 2694 | 232 | 236 | 1065 | 93 | 36 | 23 | 2 | 0 |
| Arizona | 5809 | 98 | 17 | 16977 | 373 | 147 | 7457 | 325 | 32 | 134 | 2 | 1 |
| Arkansas | 7423 | 35 | 12 | 11152 | 75 | 74 | 7685 | 169 | 57 | 89 | 0 | 1 |
| California | 27493 | 2846 | 287 | 56158 | 8727 | 1108 | 29079 | 9287 | 480 | 417 | 92 | 8 |
| Colorado | 4493 | 84 | 12 | 16648 | 418 | 67 | 5934 | 287 | 26 | 270 | 6 | 1 |
| Connecticut | 7817 | 194 | 3 | 11902 | 295 | 16 | 4050 | 301 | 5 | 68 | 5 | 0 |
| Delaware | 1254 | 18 | 3 | 3335 | 72 | 4 | 992 | 46 | 3 | 37 | 2 | 0 |
| District Of Columbia | 105 | 6 | 1 | 134 | 28 | 1 | 63 | 7 | 1 | 1 | 1 | 0 |
| Florida | 16069 | 272 | 22 | 50601 | 1065 | 137 | 34911 | 1376 | 91 | 233 | 9 | 0 |
| Georgia | 15322 | 265 | 17 | 25816 | 752 | 41 | 11595 | 622 | 21 | 177 | 12 | 0 |
| Hawaii | 516 | 437 | 1140 | 812 | 1480 | 3758 | 94 | 64 | 122 | 4 | 9 | 25 |
| Idaho | 4098 | 37 | 0 | 4407 | 45 | 0 | 4101 | 63 | 0 | 67 | 2 | 0 |
| Illinois | 21950 | 499 | 38 | 42607 | 1172 | 98 | 22416 | 1169 | 63 | 300 | 15 | 0 |
| Indiana | 15296 | 119 | 6 | 37634 | 260 | 21 | 22509 | 362 | 15 | 309 | 3 | 0 |
| Iowa | 57 | 1 | 0 | 25468 | 394 | 67 | 3630 | 56 | 10 | 111 | 2 | 0 |
| Kansas | 5540 | 64 | 9 | 14642 | 250 | 34 | 6027 | 181 | 9 | 81 | 4 | 0 |
| Kentucky | 10593 | 45 | 5 | 12274 | 71 | 16 | 15666 | 211 | 16 | 176 | 4 | 0 |
| Louisiana | 5415 | 27 | 6 | 9398 | 76 | 7 | 7698 | 175 | 13 | 88 | 1 | - |
| Maine | 5713 | 37 | 5 | 8536 | 74 | 4 | 3916 | 56 | 4 | 34 | 2 | 0 |
| Maryland | 6744 | 273 | 17 | 10175 | 456 | 21 | 5889 | 538 | 17 | 72 | 10 | 0 |
| Massachusetts | 14594 | 292 | 12 | 25868 | 668 | 33 | 12465 | 1294 | 20 | 6360 | 253 | 8 |
| Michigan | 16617 | 187 | 24 | 39368 | 422 | 35 | 24617 | 743 | 25 | 300 | 3 | 1 |
| Minnesota | 13256 | 307 | 8 | 17600 | 1457 | 17 | 11755 | 938 | 8 | 270 | 17 | 0 |
| Mississippi | 4844 | 24 | 4 | 6434 | 46 | 2 | 8017 | 83 | 4 | 69 | 1 | 0 |
| Missouri | 17173 | 138 | 16 | 21036 | 141 | 51 | 19184 | 397 | 24 | 270 | 2 | 2 |
| Montana | 1641 | 5 | 3 | 3739 | 20 | 13 | 2104 | 26 | 5 | 27 | 1 | 0 |
| Nebraska | 4551 | 36 | 7 | 8674 | 152 | 17 | 6581 | 200 | 9 | 139 | 2 | 1 |
| Nevada | 2391 | 55 | 29 | 6884 | 323 | 217 | 3070 | 215 | 65 | 58 | 6 | 4 |
| New Hampshire | 4724 | 39 | 3 | 8501 | 79 | 6 | 2682 | 70 | 10 | 57 | 2 | 0 |
| New Jersey | 26300 | 1073 | 38 | 38689 | 1835 | 71 | 22816 | 2728 | 97 | 275 | 21 | 1 |
| New Mexico | 1286 | 18 | 0 | 3778 | 74 | 14 | 1863 | 40 | 12 | 61 | 1 | 0 |
| New York | 43719 | 1535 | 61 | 65148 | 5178 | 214 | 32586 | 5706 | 202 | 519 | 36 | 2 |
| North Carolina | 19086 | 192 | 22 | 31967 | 663 | 67 | 11110 | 343 | 17 | 257 | 12 | 2 |
| North Dakota | 1477 | 7 | 3 | 3174 | 18 | 6 | 1509 | 17 | 7 | 39 | 1 | 0 |
| Ohio | 27473 | 216 | 12 | 65954 | 515 | 58 | 19421 | 314 | 20 | 984 | 14 | 0 |
| Oklahoma | 9126 | 61 | 19 | 18380 | 186 | 79 | 4938 | 125 | 18 | 110 | 3 | 1 |
| Oregon | 8713 | 160 | 48 | 14896 | 309 | 143 | 9578 | 499 | 107 | 150 | 3 | 1 |
| Pennsylvania | 26673 | 410 | 16 | 75223 | 1093 | 43 | 27651 | 951 | 36 | 429 | 8 | 0 |
| Rhode Island | 2270 | 31 | 5 | 3977 | 105 | 10 | 1544 | 70 | 4 | 46 | 2 | 0 |
| South Carolina | 6856 | 47 | 6 | 18123 | 144 | 38 | 8324 | 144 | 16 | 93 | 1 | 0 |
| South Dakota | 1869 | 19 | 0 | 4417 | 46 | 6 | 2319 | 52 | 2 | 32 | 0 | 0 |
| Tennessee | 11159 | 78 | 5 | 27775 | 203 | 18 | 18173 | 310 | 25 | 232 | 4 | 0 |
| Texas | 21031 | 658 | 54 | 35537 | 1244 | 188 | 21732 | 1693 | 71 | 369 | 26 | 2 |
| Utah | 5463 | 42 | 58 | 22440 | 200 | 440 | 11269 | 170 | 145 | 169 | 2 | 5 |
| Vermont | 2037 | 10 | 6 | 3630 | 16 | 5 | 979 | 16 | 2 | 31 | 0 | 0 |
| Virginia | 17210 | 534 | 25 | 23760 | 1346 | 66 | 10075 | 829 | 28 | 206 | 15 | 1 |
| Washington | 16136 | 596 | 106 | 21915 | 1265 | 464 | 9328 | 798 | 131 | 169 | 13 | 5 |
| West Virginia | 5876 | 14 | 0 | 12161 | 18 | 4 | 8836 | 45 | 4 | 83 | 0 | 1 |
| Wisconsin | 12147 | 244 | 12 | 18893 | 711 | 16 | 14686 | 718 | 19 | 220 | 7 | 1 |
| Wyoming | 1604 | 3 | 1 | 3135 | 19 | 7 | 2437 | 24 | 2 | 47 | 0 | 1 |

Supplemental Table D. *Child Count for Visual Impairment*

| State | Visual Impairment | | |
| --- | --- | --- | --- |
| VI_W | VI_AA | VI_W |
| **U.S.** | **12959** | **1035** | **84** |
| Alabama | 287 | 10 | 0 |
| Alaska | 19 | 3 | 0 |
| Arizona | 221 | 16 | 1 |
| Arkansas | 125 | 10 | 4 |
| California | 902 | 295 | 19 |
| Colorado | 149 | 23 | 1 |
| Connecticut | 63 | 2 | 0 |
| Delaware | 34 | 4 | 0 |
| District Of Columbia | 5 | 0 | 0 |
| Florida | 575 | 28 | 3 |
| Georgia | 358 | 30 | 1 |
| Hawaii | 4 | 16 | 23 |
| Idaho | 62 | 3 | 0 |
| Illinois | 537 | 38 | 3 |
| Indiana | 689 | 24 | 0 |
| Iowa | 57 | 1 | 0 |
| Kansas | 117 | 14 | 2 |
| Kentucky | 377 | 8 | 0 |
| Louisiana | 243 | 8 | - |
| Maine | 36 | 0 | 0 |
| Maryland | 102 | 24 | 0 |
| Massachusetts | 381 | 31 | 0 |
| Michigan | 466 | 32 | 0 |
| Minnesota | 271 | 28 | 0 |
| Mississippi | 158 | 3 | 0 |
| Missouri | 329 | 11 | 5 |
| Montana | 30 | 0 | 0 |
| Nebraska | 172 | 10 | 0 |
| Nevada | 58 | 3 | 0 |
| New Hampshire | 95 | 2 | 1 |
| New Jersey | 191 | 30 | 2 |
| New Mexico | 44 | 1 | 0 |
| New York | 504 | 36 | 0 |
| North Carolina | 273 | 19 | 3 |
| North Dakota | 34 | 1 | 0 |
| Ohio | 662 | 27 | 0 |
| Oklahoma | 350 | 8 | 0 |
| Oregon | 179 | 12 | 0 |
| Pennsylvania | 771 | 35 | 1 |
| Rhode Island | 30 | 4 | 0 |
| South Carolina | 224 | 7 | 0 |
| South Dakota | 41 | 0 | 0 |
| Tennessee | 400 | 15 | 0 |
| Texas | 1056 | 72 | 4 |
| Utah | 138 | 7 | 5 |
| Vermont | 14 | 1 | 0 |
| Virginia | 304 | 40 | 0 |
| Washington | 216 | 25 | 6 |
| West Virginia | 226 | 1 | 0 |
| Wisconsin | 340 | 17 | 0 |
| Wyoming | 40 | 0 | 0 |
